# Supplementary material for: Comparison of chemical lateral boundary conditions for air quality predictions over the contiguous United States during pollutant intrusion events
Source: Copernicus journal article supplement (doi:10.5194/acp-21-2527-2021), 2021-02-19
Supplement: Supplementary file 1 [file acp-21-2527-2021-supplement.pdf]

Supplement of Atmos. Chem. Phys., 21, 2527–2550, 2021  
<https://doi.org/10.5194/acp-21-2527-2021-supplement>  
© Author(s) 2021. This work is distributed under  
the Creative Commons Attribution 4.0 License.

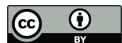

*Supplement of*

## **Comparison of chemical lateral boundary conditions for air quality predictions over the contiguous United States during pollutant intrusion events**

**Youhua Tang et al.**

*Correspondence to:* Youhua Tang ([youhua.tang@noaa.gov](mailto:youhua.tang@noaa.gov))

The copyright of individual parts of the supplement might differ from the CC BY 4.0 License.

## Supplement Figures

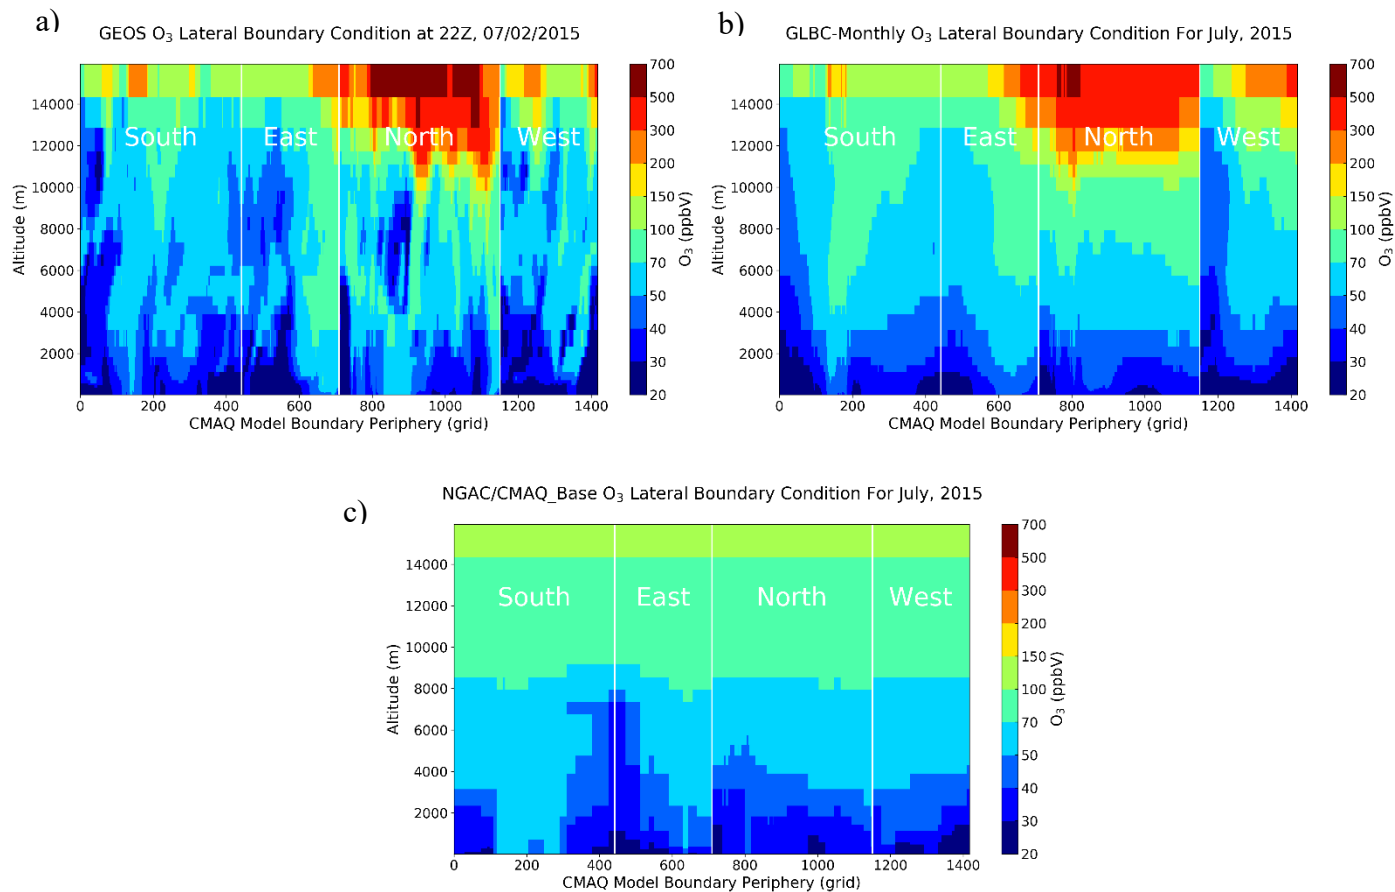

Figure S1. The lateral boundary conditions for O<sub>3</sub> used in three CMAQ simulations along the domain periphery on 2 July, 2015.

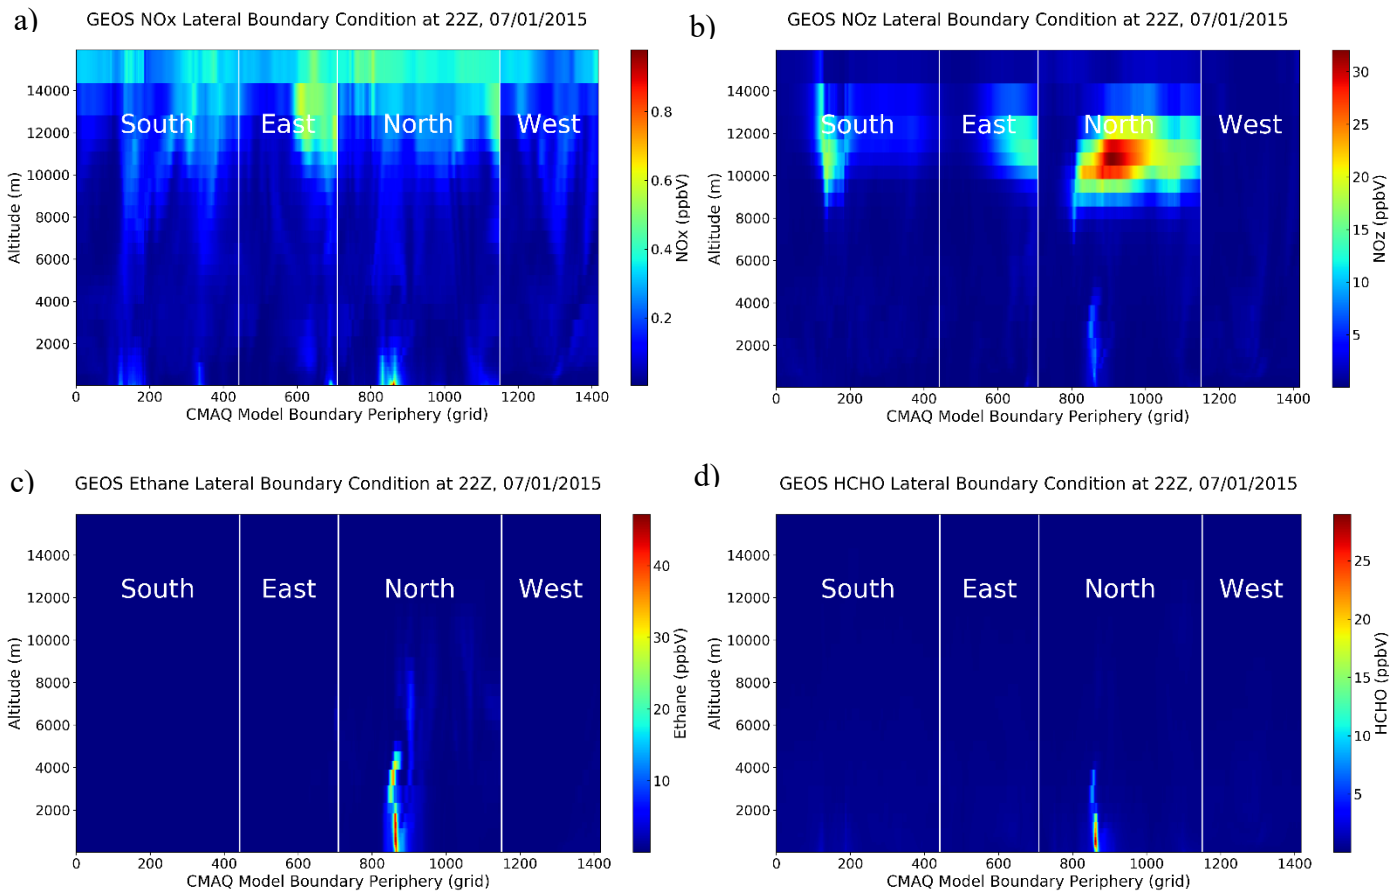

Figure S2. The GEOS lateral boundary conditions for NO<sub>x</sub>, NO<sub>z</sub>, ethane (C<sub>2</sub>H<sub>6</sub>) and HCHO along the domain periphery on 1 July, 2015.

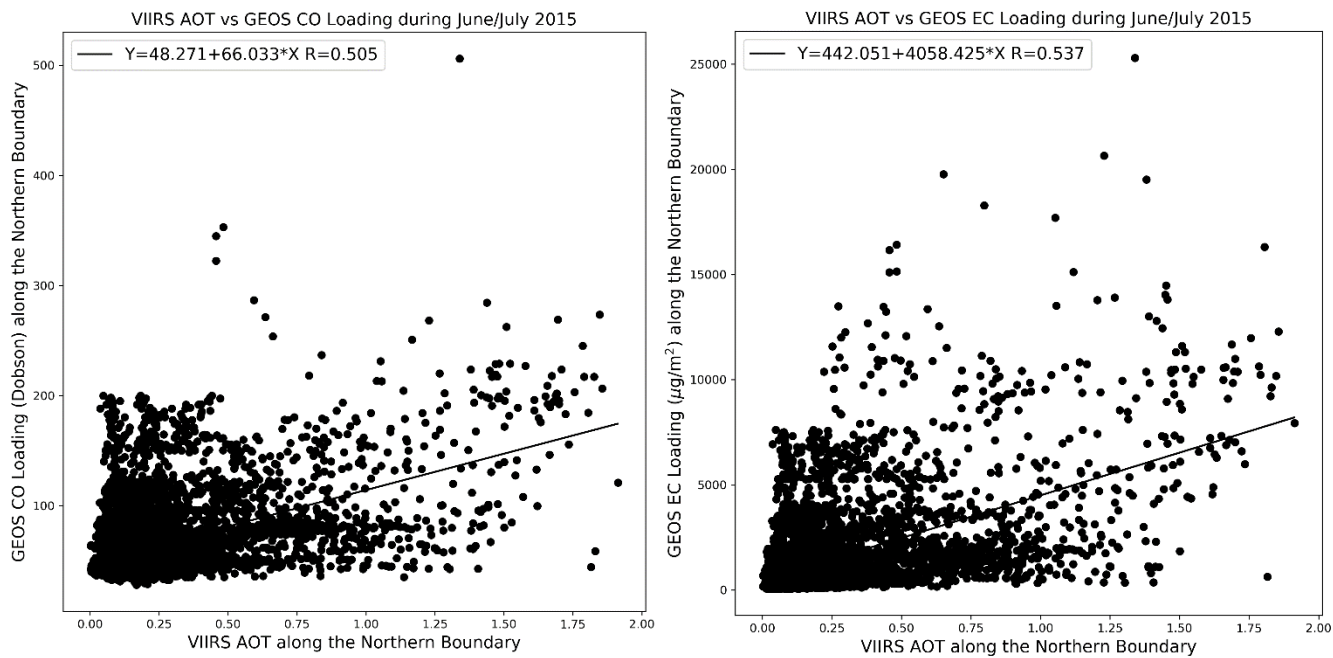

Figure S3. Correlations between AOT/CO (left) and AOT/EC (right) along the northern boundary of the CONUS domain during June to July 2015.

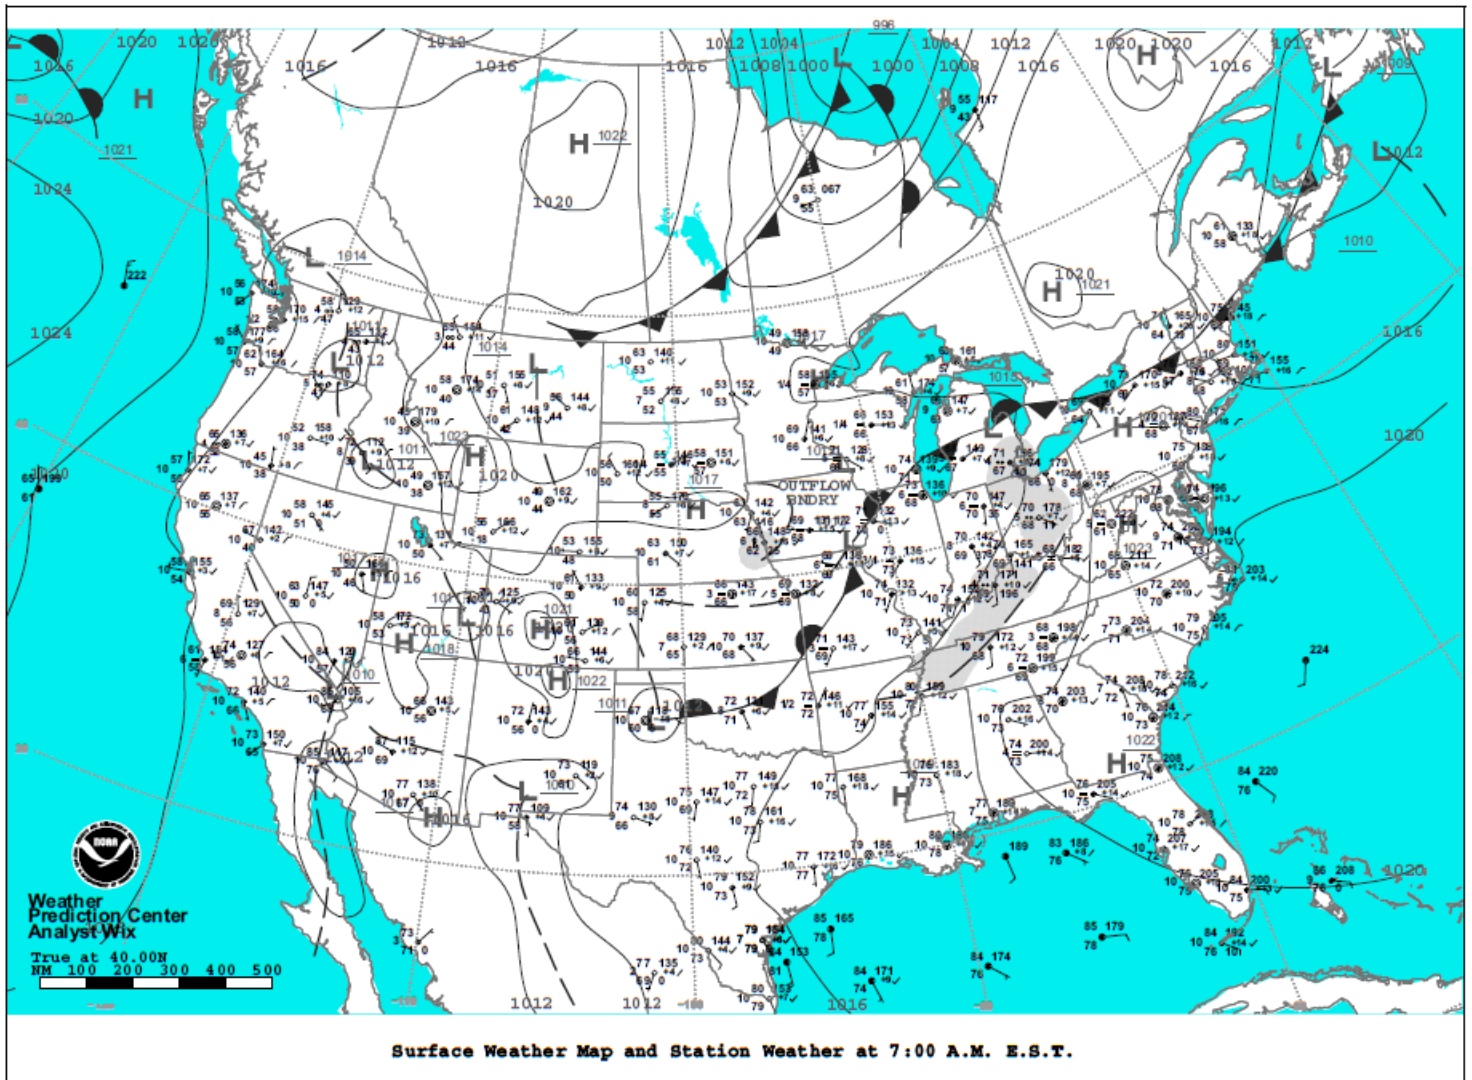

Figure S4. Surface weather map on 16 August, 2018 from <https://www.wpc.ncep.noaa.gov/>
